# Supplementary material for: Pitfalls of NMDA Receptor Modulation by Neuroactive Steroids. The Effect of Positive and Negative Modulation of NMDA Receptors in an Animal Model of Schizophrenia
Source: MDPI journal article supplement (doi:10.3390/biom11071026), 2021-07-14
Supplement: s1 [file s1]

Supplementary

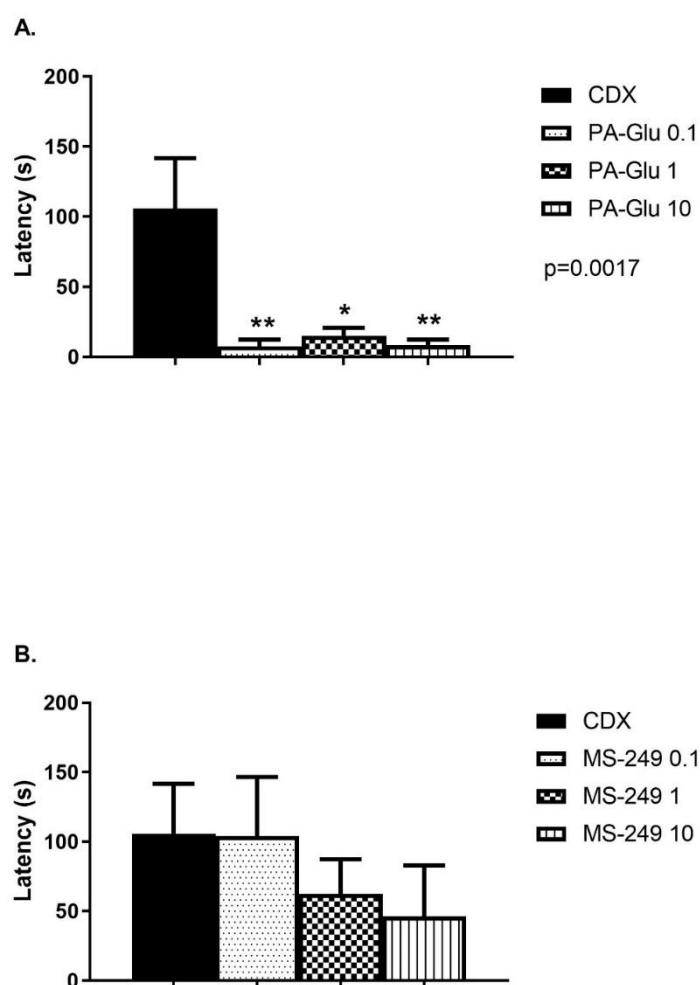

**Figure S1. Latency to enter open arms in EPM.** **A.** Latency to enter open arms analyzed by 1-way ANOVA showed a significant reduction in all PA-Glu doses administered. **B.** MS-249 had no effect on anxiety. Dunnett's post-hoc test revealed these group differences: \* $<0.05$ , \*\* $<0.01$  vs CDX controls.

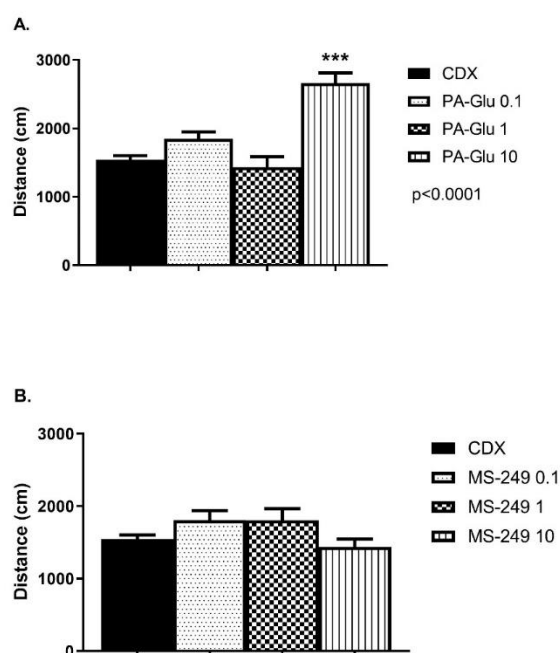

**Figure S2. Distance in EPM.** A. Highest dose of PA-Glu significantly increased distance walked while MS-249 showed no effect on locomotion in EPM, B. Data were analyzed by 1-way ANOVA followed by Dunnett's post-hoc test. \*\*\*<0.001 vs CDX controls.

**Table S1. Summary of the results.** The table depicts mean group values obtained from all behavioral experiments with both neuroactive steroids. The number of animals per group is provided as well. Data were analysed using 1-way ANOVA followed by Dunnett's post-hoc test when appropriate. MK-801 0.1 mg/kg was applied in all experiments but PPI where the dose 0.3 mg/kg was used. \*<0.05, \*\*<0.01, \*\*\*<0.001 vs CDX and #<0.05, ##<0.01, ###<0.001 vs MK-801.

| drug            | dose (mg/kg) | OF       |   | EPM      |        |            |    | PPI       |    | PA        |    | CM        |           |            |    |
|-----------------|--------------|----------|---|----------|--------|------------|----|-----------|----|-----------|----|-----------|-----------|------------|----|
|                 |              | distance | n | TOA      | LAT OA | distance   | n  | % of PPI  | n  | latency   | n  | entrances | shocks    | distance   | n  |
| CDX             |              | 71.13    | 8 | 8.82     | 105.83 | 1542.67    | 10 | 47.53     | 12 | 214.91    | 12 | 8.87      | 16.25     | 60.30      | 8  |
| MK-801          | 0.1/0.3      | 101.6    | 8 | N/A      |        |            |    | -33.10*** | 5  | 17.21***  | 8  | 23.81***  | 77.06**   | 60.37      | 16 |
| PA-Glu          | 0.01         | N/A      |   | N/A      |        |            |    | N/A       |    | N/A       |    | 9.2##     | 20.4###   | 55.73      | 5  |
|                 | 0.1          | 94.2     | 6 | 21.02    | 7.53** | 1849.77    | 9  | 47.90###  | 5  | 222.29### | 7  | 6.33###   | 10.67###  | 57.97      | 6  |
|                 | 1            | 78.37    | 6 | 14.61    | 15.04* | 1434.90    | 8  | 31.17###  | 8  | 137.37##  | 6  | 10.43##   | 17.71##   | 57.38      | 7  |
|                 | 10           | 84.13    | 6 | 98.44*** | 8.41** | 2662.61*** | 8  | 4.31**    | 8  | 47.84*    | 5  | N/A       |           |            |    |
| PA-Glu + MK-801 | 0.01         | N/A      |   | N/A      |        |            |    | N/A       |    | N/A       |    | 17.6      | 73.4      | 50.90      | 5  |
|                 | 0.1          | 104.33   | 6 | N/A      |        |            |    | -25.63*** | 4  | 138.173#  | 7  | 7.88###   | 16.38###  | 70.90      | 8  |
|                 | 1            | 76.50    | 5 | N/A      |        |            |    | -12.38*** | 8  | 135.613#  | 8  | 21.58*    | 62.58     | 72.80      | 12 |
|                 | 10           | 102.15   | 8 | N/A      |        |            |    | -33.98*** | 8  | 28.98***  | 6  | N/A       |           |            |    |
| MS-249          | 0.01         | N/A      |   | N/A      |        |            |    | N/A       |    | N/A       |    | 7.4##     | 17.00##   | 52.04      | 5  |
|                 | 0.1          | 102.43   | 6 | 10.72    | 104.08 | 1809.57    | 9  | 38.47###  | 5  | 235.56### | 8  | 6.00###   | 14.33###  | 55.27      | 6  |
|                 | 1            | 87.11    | 7 | 13.17    | 62.64  | 1804.16    | 7  | 42.24###  | 6  | 195.84### | 7  | 16.71     | 59.43     | 48.98      | 7  |
|                 | 10           | 94.93    | 7 | 13.19    | 46.25  | 1438.54    | 8  | 44.57###  | 8  | 267.8###  | 8  | N/A       |           |            |    |
| MS-249 + MK-801 | 0.01         | N/A      |   | N/A      |        |            |    | N/A       |    | N/A       |    | 23.33**   | 104.00**  | 39.63*##   | 6  |
|                 | 0.1          | 118.53** | 6 | N/A      |        |            |    | -41.04*** | 5  | 134.90    | 8  | 27.83***  | 122.00*** | 36.86*#### | 6  |
|                 | 1            | 122.10** | 6 | N/A      |        |            |    | -25.18*** | 5  | 165.19##  | 15 | 21.88*    | 72.63*    | 62.12      | 8  |
|                 | 10           | 93.02    | 6 | N/A      |        |            |    | 10.49     | 6  | 54.10***  | 7  | N/A       |           |            |    |
